# Supplementary material for: Perception of the Online Learning Environment of Nursing Students in Slovenia: Validation of the DREEM Questionnaire
Source: MDPI journal article supplement (doi:10.3390/healthcare9080998), 2021-08-05
Supplement: s1 [file s1]

# Supplementary Material A: Inter-item correlations of the Subscale

**Table S1:** Inter-item correlations of the Subscale Students' Perception of Learning (SPL).

| Correlation between SPL items |       |       |       |       |       |       |       |       |       |       |       |       |
|-------------------------------|-------|-------|-------|-------|-------|-------|-------|-------|-------|-------|-------|-------|
|                               | Q1    | Q7    | Q13   | Q16   | Q20   | Q22   | Q24   | Q25   | Q38   | Q44   | Q47   | Q48   |
| Q1                            | 1.000 | 0.515 | 0.395 | 0.221 | 0.324 | 0.344 | 0.423 | 0.057 | 0.306 | 0.350 | 0.414 | 0.132 |
| Q7                            | 0.515 | 1.000 | 0.591 | 0.360 | 0.573 | 0.405 | 0.486 | 0.140 | 0.384 | 0.440 | 0.482 | 0.174 |
| Q13                           | 0.395 | 0.591 | 1.000 | 0.396 | 0.563 | 0.523 | 0.418 | 0.274 | 0.322 | 0.409 | 0.510 | 0.107 |
| Q16                           | 0.221 | 0.360 | 0.396 | 1.000 | 0.535 | 0.403 | 0.459 | 0.165 | 0.241 | 0.450 | 0.479 | 0.175 |
| Q20                           | 0.324 | 0.573 | 0.563 | 0.535 | 1.000 | 0.514 | 0.437 | 0.059 | 0.470 | 0.505 | 0.585 | 0.098 |
| Q22                           | 0.344 | 0.405 | 0.523 | 0.403 | 0.514 | 1.000 | 0.450 | 0.100 | 0.304 | 0.475 | 0.545 | 0.067 |
| Q24                           | 0.423 | 0.486 | 0.418 | 0.459 | 0.437 | 0.450 | 1.000 | 0.162 | 0.321 | 0.518 | 0.456 | 0.220 |
| Q25                           | 0.057 | 0.140 | 0.274 | 0.165 | 0.059 | 0.100 | 0.162 | 1.000 | 0.029 | 0.185 | 0.137 | 0.240 |
| Q38                           | 0.306 | 0.384 | 0.322 | 0.241 | 0.470 | 0.304 | 0.321 | 0.029 | 1.000 | 0.278 | 0.366 | 0.206 |
| Q44                           | 0.350 | 0.440 | 0.409 | 0.450 | 0.505 | 0.475 | 0.518 | 0.185 | 0.278 | 1.000 | 0.547 | 0.131 |
| Q47                           | 0.414 | 0.482 | 0.510 | 0.479 | 0.585 | 0.545 | 0.456 | 0.137 | 0.366 | 0.547 | 1.000 | 0.157 |
| Q48                           | 0.132 | 0.174 | 0.107 | 0.175 | 0.098 | 0.067 | 0.220 | 0.240 | 0.206 | 0.131 | 0.157 | 1.000 |

Q = question.

**Table S2:** Inter-item correlations of the Subscale Students' Perception of Teachers (SPT).

| Correlation between SPT items |       |       |       |       |       |       |       |       |       |       |       |
|-------------------------------|-------|-------|-------|-------|-------|-------|-------|-------|-------|-------|-------|
|                               | Q2    | Q6    | Q8    | Q9    | Q18   | Q29   | Q32   | Q37   | Q39   | Q40   | Q50   |
| Q2                            | 1.000 | 0.382 | 0.167 | 0.000 | 0.418 | 0.382 | 0.205 | 0.495 | 0.279 | 0.558 | 0.165 |
| Q6                            | 0.382 | 1.000 | 0.160 | 0.106 | 0.483 | 0.285 | 0.241 | 0.398 | 0.228 | 0.485 | 0.195 |
| Q8                            | 0.167 | 0.160 | 1.000 | 0.379 | 0.286 | 0.391 | 0.299 | 0.379 | 0.499 | 0.350 | 0.404 |
| Q9                            | 0.000 | 0.106 | 0.379 | 1.000 | 0.082 | 0.197 | 0.151 | 0.170 | 0.230 | 0.242 | 0.193 |
| Q18                           | 0.418 | 0.483 | 0.286 | 0.082 | 1.000 | 0.493 | 0.414 | 0.486 | 0.268 | 0.557 | 0.257 |
| Q29                           | 0.382 | 0.285 | 0.391 | 0.197 | 0.493 | 1.000 | 0.516 | 0.598 | 0.438 | 0.543 | 0.295 |
| Q32                           | 0.205 | 0.241 | 0.299 | 0.151 | 0.414 | 0.516 | 1.000 | 0.457 | 0.182 | 0.420 | 0.216 |
| Q37                           | 0.495 | 0.398 | 0.379 | 0.170 | 0.486 | 0.598 | 0.457 | 1.000 | 0.390 | 0.620 | 0.271 |
| Q39                           | 0.279 | 0.228 | 0.499 | 0.230 | 0.268 | 0.438 | 0.182 | 0.390 | 1.000 | 0.382 | 0.490 |
| Q40                           | 0.558 | 0.485 | 0.350 | 0.242 | 0.557 | 0.543 | 0.420 | 0.620 | 0.382 | 1.000 | 0.291 |
| Q50                           | 0.165 | 0.195 | 0.404 | 0.193 | 0.257 | 0.295 | 0.216 | 0.271 | 0.490 | 0.291 | 1.000 |

Q = question.

**Table S3:** Inter-item correlations of the Subscale Students' Academic-Self Perception (SAP).

| Correlation between SAP items |       |       |       |       |       |       |       |       |
|-------------------------------|-------|-------|-------|-------|-------|-------|-------|-------|
|                               | Q5    | Q10   | Q21   | Q26   | Q27   | Q31   | Q41   | Q45   |
| Q5                            | 1.000 | 0.106 | 0.248 | 0.290 | 0.173 | 0.300 | 0.290 | 0.142 |
| Q10                           | 0.106 | 1.000 | 0.351 | 0.082 | 0.389 | 0.142 | 0.341 | 0.021 |
| Q21                           | 0.248 | 0.351 | 1.000 | 0.115 | 0.170 | 0.267 | 0.346 | 0.002 |
| Q26                           | 0.290 | 0.082 | 0.115 | 1.000 | 0.246 | 0.289 | 0.343 | 0.098 |
| Q27                           | 0.173 | 0.389 | 0.170 | 0.246 | 1.000 | 0.106 | 0.494 | 0.290 |
| Q31                           | 0.300 | 0.142 | 0.267 | 0.289 | 0.106 | 1.000 | 0.402 | 0.210 |
| Q41                           | 0.290 | 0.341 | 0.346 | 0.343 | 0.494 | 0.402 | 1.000 | 0.306 |
| Q45                           | 0.142 | 0.021 | 0.002 | 0.098 | 0.290 | 0.210 | 0.306 | 1.000 |

Q = question.

**Table S4:** Inter-item correlations of the Subscale Students' Perception of Atmosphere (SPA).

| Correlation between SPA items |        |        |        |       |       |       |       |       |       |        |       |       |
|-------------------------------|--------|--------|--------|-------|-------|-------|-------|-------|-------|--------|-------|-------|
|                               | Q11    | Q12    | Q17    | Q23   | Q30   | Q33   | Q34   | Q35   | Q36   | Q42    | Q43   | Q49   |
| Q11                           | 1.000  | 0.369  | -0.029 | 0.469 | 0.309 | 0.345 | 0.487 | 0.402 | 0.169 | 0.384  | 0.376 | 0.235 |
| Q12                           | 0.369  | 1.000  | -0.009 | 0.350 | 0.304 | 0.143 | 0.325 | 0.473 | 0.278 | 0.321  | 0.417 | 0.128 |
| Q17                           | -0.029 | -0.009 | 1.000  | 0.117 | 0.164 | 0.150 | 0.244 | 0.139 | 0.037 | -0.038 | 0.081 | 0.359 |
| Q23                           | 0.469  | 0.350  | 0.117  | 1.000 | 0.401 | 0.385 | 0.498 | 0.416 | 0.305 | 0.415  | 0.528 | 0.460 |
| Q30                           | 0.309  | 0.304  | 0.164  | 0.401 | 1.000 | 0.342 | 0.301 | 0.439 | 0.358 | 0.302  | 0.477 | 0.385 |
| Q33                           | 0.345  | 0.143  | 0.150  | 0.385 | 0.342 | 1.000 | 0.566 | 0.323 | 0.197 | 0.349  | 0.363 | 0.280 |
| Q34                           | 0.487  | 0.325  | 0.244  | 0.498 | 0.301 | 0.566 | 1.000 | 0.384 | 0.127 | 0.396  | 0.304 | 0.432 |
| Q35                           | 0.402  | 0.473  | 0.139  | 0.416 | 0.439 | 0.323 | 0.384 | 1.000 | 0.356 | 0.423  | 0.532 | 0.339 |
| Q36                           | 0.169  | 0.278  | 0.037  | 0.305 | 0.358 | 0.197 | 0.127 | 0.356 | 1.000 | 0.235  | 0.378 | 0.137 |
| Q42                           | 0.384  | 0.321  | -0.038 | 0.415 | 0.302 | 0.349 | 0.396 | 0.423 | 0.235 | 1.000  | 0.563 | 0.330 |
| Q43                           | 0.376  | 0.417  | 0.081  | 0.528 | 0.477 | 0.363 | 0.304 | 0.532 | 0.378 | 0.563  | 1.000 | 0.290 |
| Q49                           | 0.235  | 0.128  | 0.359  | 0.460 | 0.385 | 0.280 | 0.432 | 0.339 | 0.137 | 0.330  | 0.290 | 1.000 |

Q = question.

**Table S5:** Inter-item correlations of the Subscale Students' Social-Self Perception (SSP).

| Correlation between SSP items |       |       |       |       |       |       |       |
|-------------------------------|-------|-------|-------|-------|-------|-------|-------|
|                               | Q3    | Q4    | Q14   | Q15   | Q19   | Q28   | Q46   |
| Q3                            | 1.000 | 0.269 | 0.345 | 0.185 | 0.233 | 0.157 | 0.041 |
| Q4                            | 0.269 | 1.000 | 0.226 | 0.069 | 0.116 | 0.138 | 0.171 |
| Q14                           | 0.345 | 0.226 | 1.000 | 0.226 | 0.019 | 0.155 | 0.060 |
| Q15                           | 0.185 | 0.069 | 0.226 | 1.000 | 0.120 | 0.200 | 0.114 |
| Q19                           | 0.233 | 0.116 | 0.019 | 0.120 | 1.000 | 0.322 | 0.109 |
| Q28                           | 0.157 | 0.138 | 0.155 | 0.200 | 0.322 | 1.000 | 0.116 |
| Q46                           | 0.041 | 0.171 | 0.060 | 0.114 | 0.109 | 0.116 | 1.000 |

Q = question.
